# Supplementary material for: Cd(ii) and Zn(ii) coordination polymer-assisted CO2/cyclohexene oxide copolymerization with a double metal cyanide catalyst
Source: Royal Society of Chemistry journal article supplement (doi:10.1039/d3ce01289a), 2024-01-01
Supplement: d3ce01289a1.pdf [file d3ce01289a1.pdf]

## Electronic Supplementary Information (ESI)

### **Cd(II) and Zn(II) coordination polymers assisted CO<sub>2</sub>/cyclohexene oxide copolymerization with double metal cyanide catalyst**

Zi-Qing Huang,<sup>a</sup> Jia-Qi Chen,<sup>a</sup> Xiao-Yu Zhang,<sup>a</sup> Cheng-Kai Yuan,<sup>a</sup> Peng Wang,<sup>a</sup> Yue Zhao,<sup>a</sup> Bao-Cheng Zhao,<sup>\*b</sup> Wei-Xin Qi<sup>\*b</sup> and Wei-Yin Sun<sup>\*a</sup>

<sup>a</sup> Coordination Chemistry Institute, State Key Laboratory of Coordination Chemistry, School of Chemistry and Chemical Engineering, Nanjing National Laboratory of Microstructures, Collaborative Innovation Center of Advanced Microstructures, Nanjing University, Nanjing 210023, China.

<sup>b</sup> Huaian Bud Polyurethane Science & Technology Co., Ltd., Huaian 223100, China

\* Corresponding authors.

*Email addresses:* zbc@budpu.com (B. C. Zhao); qwx@budpu.com (W. X. Qi); sunwy@nju.edu.cn (W. Y. Sun)

### **EXPERIMENTAL**

**X-ray crystallography.** Single-crystal X-ray diffraction data were collected on a Bruker D8 Venture diffractometer with graphite-monochromated Mo K $\alpha$  radiation ( $\lambda = 0.71073 \text{ \AA}$ ). The integration of diffraction data and intensity corrections for the Lorentz and polarization effects were performed by using SAINT program.<sup>1</sup> Semi-empirical absorption corrections were applied using SADABS program.<sup>2</sup> The structures were solved by direct methods with SHELXT-2014, expanded by subsequent Fourier-difference synthesis, and all the non-hydrogen atoms were refined anisotropically on  $F^2$  using the full-matrix least-squares technique with the SHELXL-2018 crystallographic software package.<sup>3,4</sup> The free solvent molecules in the unit cell have been taken into account by SQUEEZE option of the PLATON program.<sup>5</sup> The reported refinements are of the guest-free structures obtained by the SQUEEZE routine and the results were attached to the CIF files. The details of crystal parameters, data collection and refinements for **1 - 3** are listed in Table 1, and the selected bond lengths and angles are given in Table S1.

**Table S1** Selected bond lengths (Å) and angles (°) for **1**, **2** and **3**.

| <b>1</b>        |            |                 |           |
|-----------------|------------|-----------------|-----------|
| Cd(1)-O(1)      | 2.5525(17) | O(2)-Cd(1)-N(2) | 146.05(8) |
| Cd(1)-O(2)      | 2.2417(18) | O(2)-Cd(1)-N(3) | 82.83(7)  |
| Cd(1)-O(3)      | 2.5287(19) | O(3)-Cd(1)-O(1) | 90.95(6)  |
| Cd(1)-O(4)      | 2.2988(17) | O(4)-Cd(1)-O(1) | 136.15(6) |
| Cd(1)-N(1)      | 2.3447(19) | O(4)-Cd(1)-O(3) | 53.80(6)  |
| Cd(1)-N(2)      | 2.3372(18) | O(4)-Cd(1)-N(1) | 114.48(8) |
| Cd(1)-N(3)      | 2.407(2)   | O(4)-Cd(1)-N(2) | 100.69(7) |
| O(2)-Cd(1)-O(1) | 53.88(6)   | O(4)-Cd(1)-N(3) | 83.45(7)  |
| O(2)-Cd(1)-O(3) | 83.46(8)   | N(1)-Cd(1)-O(1) | 80.56(6)  |
| O(2)-Cd(1)-O(4) | 92.83(8)   | N(1)-Cd(1)-O(3) | 82.59(6)  |
| O(2)-Cd(1)-N(1) | 131.87(7)  | N(1)-Cd(1)-N(3) | 136.30(7) |
| N(2)-Cd(1)-O(1) | 122.94(6)  | N(2)-Cd(1)-N(3) | 68.18(7)  |
| N(2)-Cd(1)-O(3) | 129.43(6)  | N(3)-Cd(1)-O(1) | 114.77(6) |
| N(2)-Cd(1)-N(1) | 69.40(7)   | N(3)-Cd(1)-O(3) | 134.12(6) |

  

| <b>2</b>          |          |                   |            |
|-------------------|----------|-------------------|------------|
| Zn(1)-O(1)#1      | 2.009(5) | O(3)-Zn(1)-O(1)#1 | 103.20(18) |
| Zn(1)-O(3)        | 1.985(5) | O(3)-Zn(1)-N(1)   | 101.1(2)   |
| Zn(1)-N(1)        | 2.169(6) | O(3)-Zn(1)-N(2)   | 131.3(2)   |
| Zn(1)-N(2)        | 2.081(5) | O(3)-Zn(1)-N(3)   | 96.5(2)    |
| Zn(1)-N(3)        | 2.195(6) | N(1)-Zn(1)-N(3)   | 150.3(2)   |
| O(1)#1-Zn(1)-N(1) | 97.7(2)  | N(2)-Zn(1)-N(1)   | 75.8(2)    |
| O(1)#1-Zn(1)-N(2) | 125.5(2) | N(2)-Zn(1)-N(3)   | 74.7(2)    |
| O(1)#1-Zn(1)-N(3) | 101.2(2) |                   |            |

Symmetry code: #1 +x, -1+y, +z

  

| <b>3</b>     |          |                     |            |
|--------------|----------|---------------------|------------|
| Cd(1)-O(1)   | 2.252(3) | O(1)-Cd(1)-N(1)     | 99.63(12)  |
| Cd(1)-O(7)#1 | 2.398(3) | O(1)-Cd(1)-N(2)     | 106.57(12) |
| Cd(1)-O(8)#1 | 2.376(3) | O(1)-Cd(1)-N(3)     | 91.71(12)  |
| Cd(1)-N(1)   | 2.367(4) | O(7)#1-Cd(1)-N(3)   | 103.02(13) |
| Cd(1)-N(2)   | 2.342(4) | O(8)#1-Cd(1)-O(7)#1 | 54.82(12)  |
| Cd(1)-N(3)   | 2.407(4) | O(8)#1-Cd(1)-N(3)   | 79.98(13)  |

|                   |            |                   |            |
|-------------------|------------|-------------------|------------|
| O(1)-Cd(1)-O(7)#1 | 148.45(13) | N(1)-Cd(1)-O(7)#1 | 88.12(12)  |
| O(1)-Cd(1)-O(8)#1 | 101.89(11) | N(1)-Cd(1)-O(8)#1 | 135.51(13) |
| N(1)-Cd(1)-N(3)   | 137.68(14) | N(2)-Cd(1)-O(7)#1 | 104.79(13) |
| N(2)-Cd(1)-N(1)   | 69.41(13)  | N(2)-Cd(1)-O(8)#1 | 137.40(12) |
| N(2)-Cd(1)-N(3)   | 68.28(13)  |                   |            |

Symmetry code: #1 -x, 1-y, -1/2+z

**Table S2** The member atoms of selected conjugate rings for **1 - 3** (CgI = plane number I).

| 1   |                   |     |     |     |     |     |
|-----|-------------------|-----|-----|-----|-----|-----|
| CgI | Ring member atoms |     |     |     |     |     |
| Cg1 | N4                | N5  | N6  | C22 | C23 |     |
| Cg2 | N1                | C1  | C2  | C3  | C4  | C5  |
| Cg3 | N2                | C6  | C7  | C8  | C9  | C10 |
| Cg4 | N3                | C11 | C12 | C13 | C14 | C15 |
| Cg5 | C16               | C17 | C18 | C19 | C20 | C21 |
| 2   |                   |     |     |     |     |     |
| CgI | Ring member atoms |     |     |     |     |     |
| Cg1 | N4                | N5  | N5  | C30 | C31 |     |
| Cg2 | N1                | C9  | C10 | C11 | C12 | C13 |
| Cg3 | N2                | C14 | C15 | C16 | C17 | C18 |
| Cg4 | N3                | C19 | C20 | C21 | C22 | C23 |
| 3   |                   |     |     |     |     |     |
| CgI | Ring member atoms |     |     |     |     |     |
| Cg1 | N4                | N5  | N6  | C22 | C23 |     |
| Cg2 | N1                | C1  | C2  | C3  | C4  | C5  |
| Cg3 | N2                | C6  | C7  | C8  | C9  | C10 |
| Cg4 | N3                | C11 | C12 | C13 | C14 | C15 |
| Cg5 | C16               | C17 | C18 | C19 | C20 | C21 |

**Table S3** The selected Cg-Cg distances (Å) between ring centroids for **1 - 3**.

| 1 |          |             |   |          |             |
|---|----------|-------------|---|----------|-------------|
|   | CgI->CgJ | Distance    |   | CgI->CgJ | Distance    |
| 1 | Cg1->Cg4 | 3.6677 (18) | 3 | Cg3->Cg2 | 3.7984 (15) |
| 2 | Cg5->Cg3 | 3.6615 (16) |   |          |             |
| 2 |          |             |   |          |             |
|   | CgI->CgJ | Distance    |   | CgI->CgJ | Distance    |
| 1 | Cg4->Cg2 | 3.5902 (4)  | 3 | Cg3->Cg2 | 3.7962 (5)  |
| 2 | Cg1->Cg1 | 3.6726 (4)  |   |          |             |
| 3 |          |             |   |          |             |
|   | CgI->CgJ | Distance    |   | CgI->CgJ | Distance    |
| 1 | Cg4->Cg5 | 3.5741(3)   | 4 | Cg1->Cg2 | 3.8046(3)   |
| 2 | Cg3->Cg3 | 3.5896(3)   | 5 | Cg5->Cg2 | 3.9194(3)   |
| 3 | Cg2->Cg2 | 3.5968(3)   | 6 | Cg5->Cg4 | 3.5741(3)   |

**Table S4** Hydrogen bonding data of **1 - 3**.

| 1                                                                      |                             |                               |                                        |                             |
|------------------------------------------------------------------------|-----------------------------|-------------------------------|----------------------------------------|-----------------------------|
| <i>D</i> -H... <i>A</i>                                                | <i>d</i> ( <i>D</i> -H) / Å | <i>d</i> (H... <i>A</i> ) / Å | <i>d</i> ( <i>D</i> ... <i>A</i> ) / Å | <i>D</i> -H... <i>A</i> / ° |
| C(23)-H(23)---O(3) #1                                                  | 0.93                        | 2.47                          | 3.330(4)                               | 154                         |
| C(4)-H(4)---O(1) #2                                                    | 0.93                        | 2.53                          | 3.448(3)                               | 169                         |
| C(7)-H(7)---O(1) #2                                                    | 0.93                        | 2.38                          | 3.286(3)                               | 164                         |
| C(9)-H(9)---O(5) #3                                                    | 0.93                        | 2.26                          | 3.163(8)                               | 165                         |
| C(21)-H(21)---O(5) #3                                                  | 0.93                        | 2.30                          | 3.014(7)                               | 133                         |
| Symmetry code: #1 -1+x,3/2-y,-3/2+z; #2 x,3/2-y,-1/2+z; #3 -1+x,y,-1+z |                             |                               |                                        |                             |
| 2                                                                      |                             |                               |                                        |                             |
| <i>D</i> -H... <i>A</i>                                                | <i>d</i> ( <i>D</i> -H) / Å | <i>d</i> (H... <i>A</i> ) / Å | <i>d</i> ( <i>D</i> ... <i>A</i> ) / Å | <i>D</i> -H... <i>A</i> / ° |
| C(9)-H(9)---N(6) #1                                                    | 0.95                        | 2.44                          | 3.3393(4)                              | 158                         |
| C(12)-H(12)---O(4) #2                                                  | 0.95                        | 2.25                          | 3.1769(4)                              | 163                         |
| C(20)-H(20)---O(2) #3                                                  | 0.95                        | 2.36                          | 3.2800(4)                              | 162                         |
| Symmetry code: #1 x,y,-1+z; #2 2-x,-y,1-z; #3 1-x,-y,1-z               |                             |                               |                                        |                             |
| 3                                                                      |                             |                               |                                        |                             |
| <i>D</i> -H... <i>A</i>                                                | <i>d</i> ( <i>D</i> -H) / Å | <i>d</i> (H... <i>A</i> ) / Å | <i>d</i> ( <i>D</i> ... <i>A</i> ) / Å | <i>D</i> -H... <i>A</i> / ° |
| C(17)-H(17)---O(1) #1                                                  | 0.95                        | 2.44                          | 3.3557(3)                              | 162                         |

|                        |      |      |           |     |
|------------------------|------|------|-----------|-----|
| C(18)-H(18)---O(7) #2  | 0.95 | 2.54 | 3.3430(3) | 142 |
| C(20)-H(20) ...O(5) #3 | 0.95 | 2.45 | 3.3664(3) | 163 |
| C(22)-H(22) ...O(7) #2 | 0.95 | 2.48 | 3.3703(3) | 156 |
| C(29)-H(29) ...O(2) #4 | 0.95 | 2.12 | 3.0632(2) | 174 |
| C(36)-H(36) ...O(8) #5 | 0.95 | 2.48 | 3.2531(2) | 138 |

Symmetry codes: #1 1-y,1-x,1/2-z; #2 3/2-x,1/2+y,1/4-z; #3 3/2-y,-1/2+x,1/4+z; #4 1/2+y,1/2-x,-1/4+z; #5 1/2-y,-1/2+x,1/4+z

**Table S5** Comparison with other reported systems in CO<sub>2</sub>/CHO reaction.

| Catalyst                | T<br>(°C) | P <sub>CO<sub>2</sub></sub><br>(MPa) | F(CO <sub>2</sub> )<br>(%) | Time<br>(h)        | Reference        |
|-------------------------|-----------|--------------------------------------|----------------------------|--------------------|------------------|
| <b>DMC/CP 1</b>         | 80        | 1                                    | 65                         | 12                 | <b>This work</b> |
| Zn-Co DMC-Cl            | 80        | 0.96                                 | 53                         | 4                  | 6                |
| DMC-EEA                 | 115       | 4.35                                 | 86                         | 3                  | 7                |
| Fe Cat. PPnCl           | 90        | 4.5                                  | 78                         | 3                  | 8                |
| Zn-Ni DMC               | 110       | 5                                    | 45                         | 20                 | 9                |
| DMC/Salen-Co(III)/PPnCl | 60        | 13.79                                | 98.7                       | Flushing<br>method | 10               |

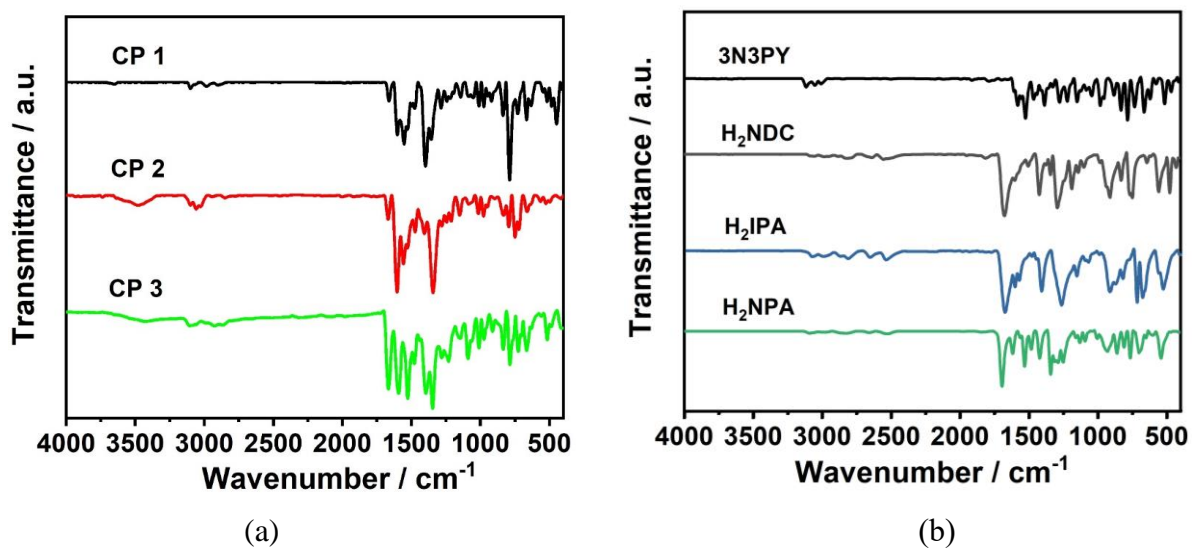

**Fig. S1** FTIR spectra of CPs **1** – **3** (a) and ligands (b).

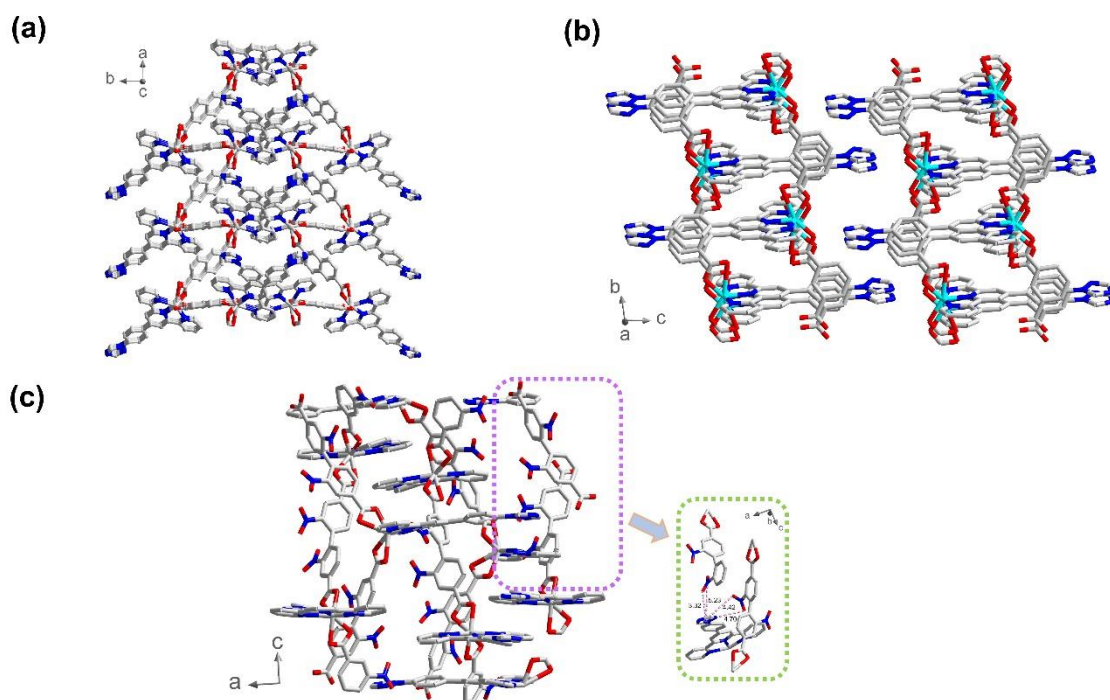

**Fig. S2** 3D supramolecular structures of **1** (a), **2** (b) and **3** (c).

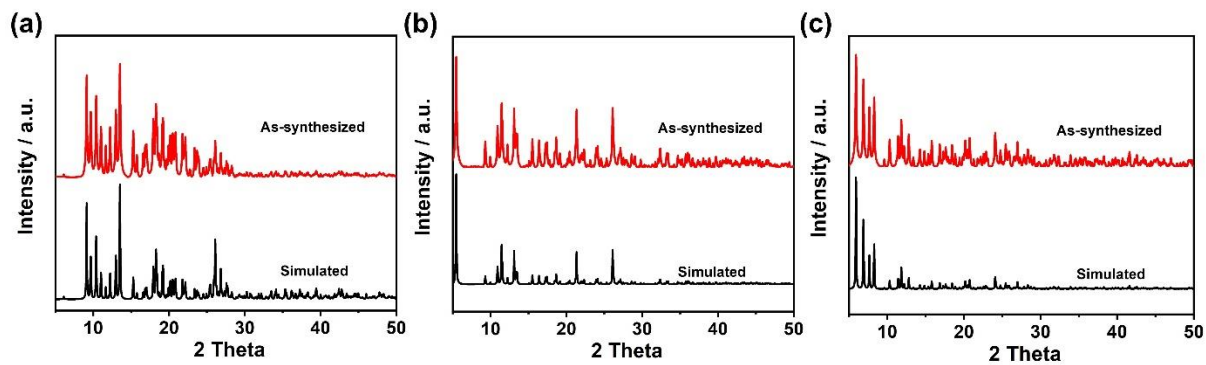

**Fig. S3** PXR D patterns of **1** (a), **2** (b) and **3** (c).

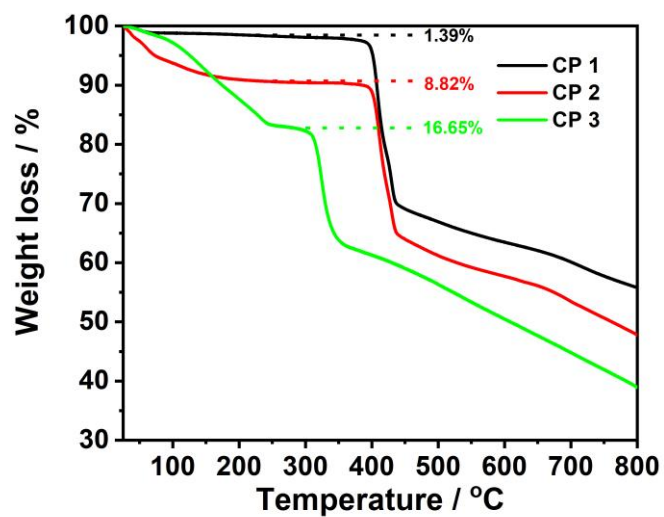

**Fig. S4** TG data of CPs **1** - **3**.

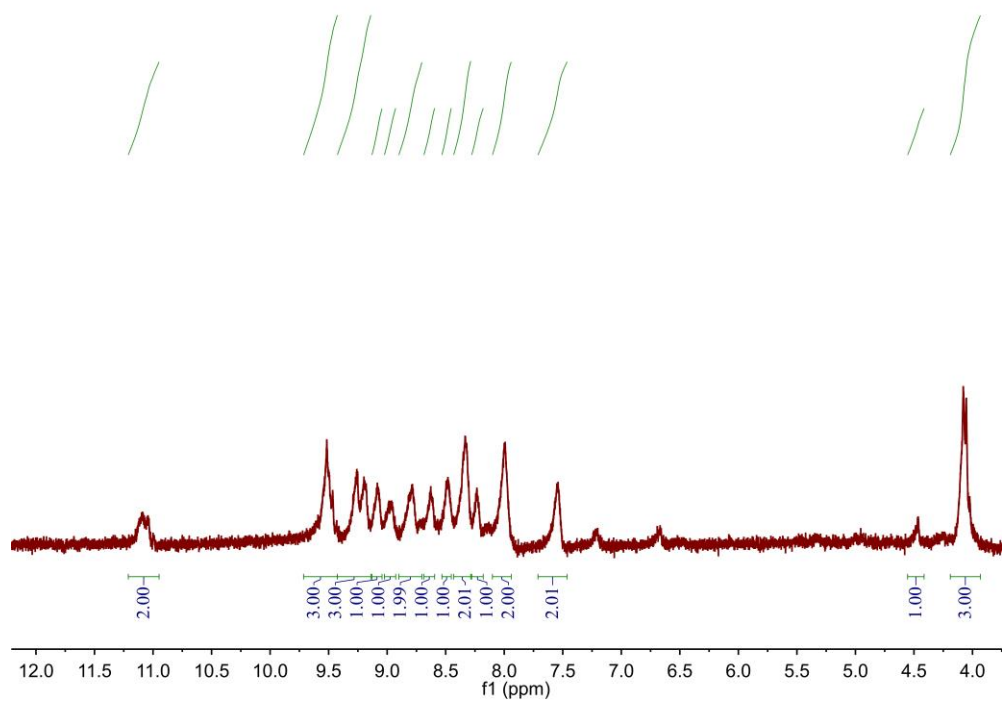

**Fig. S5**  $^1\text{H-NMR}$  ( $\text{DMSO-d}_6$ , 500M) spectrum of CP 1Me.

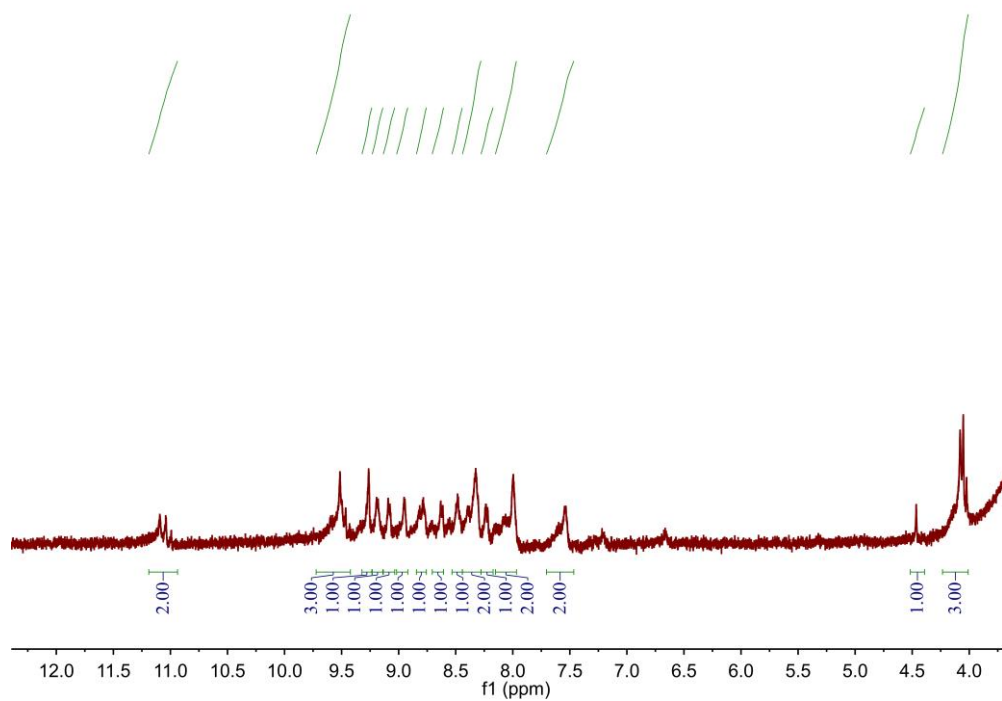

**Fig. S6**  $^1\text{H-NMR}$  ( $\text{DMSO-d}_6$ , 500M) spectrum of CP 2Me.



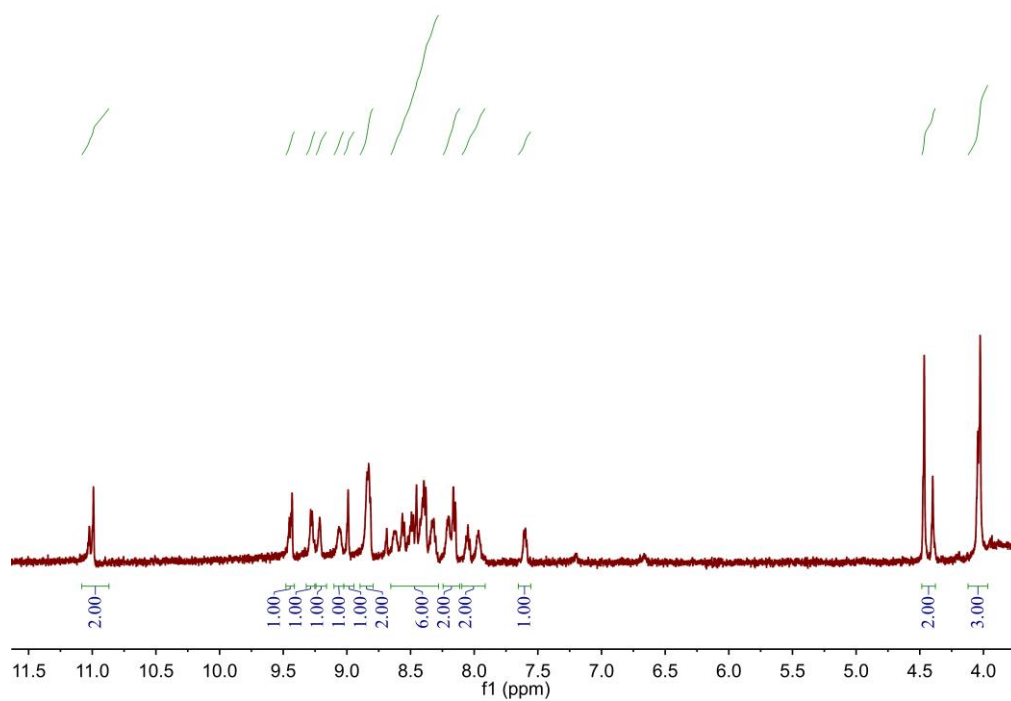

**Fig. S7**  $^1\text{H-NMR}$  (DMSO- $d_6$ , 500M) spectrum of CP 3Me.

The proportion of carbonate in the obtained polymer is recorded as F(CO<sub>2</sub>) value, and the calculated method is shown in equ. S1

$$F(\text{CO}_2) = \frac{A(4.32-4.80)}{A(4.32-4.80) + A(3.26-3.75)} \times 100\% \quad (\text{S1})$$

A indicates the integrated area of <sup>1</sup>H NMR signals. In addition, the formula to calculate the conversion rate of CHO (C<sub>CHO</sub>) is as following:

$$C_{\text{CHO}} = \left[ 1 - \frac{A_{3.14}}{A(4.32-4.80) + A(3.26-3.75) + A_{3.14}} \right] \times 100\% \quad (\text{S2})$$

Besides, P-OC(O)O- is recorded as the proportion of carbonate in the total crude product and it is calculated as equ. S3

$$P_{\text{-OC(O)O-}} = F(\text{CO}_2) \times C_{\text{CHO}} \quad (\text{S3})$$

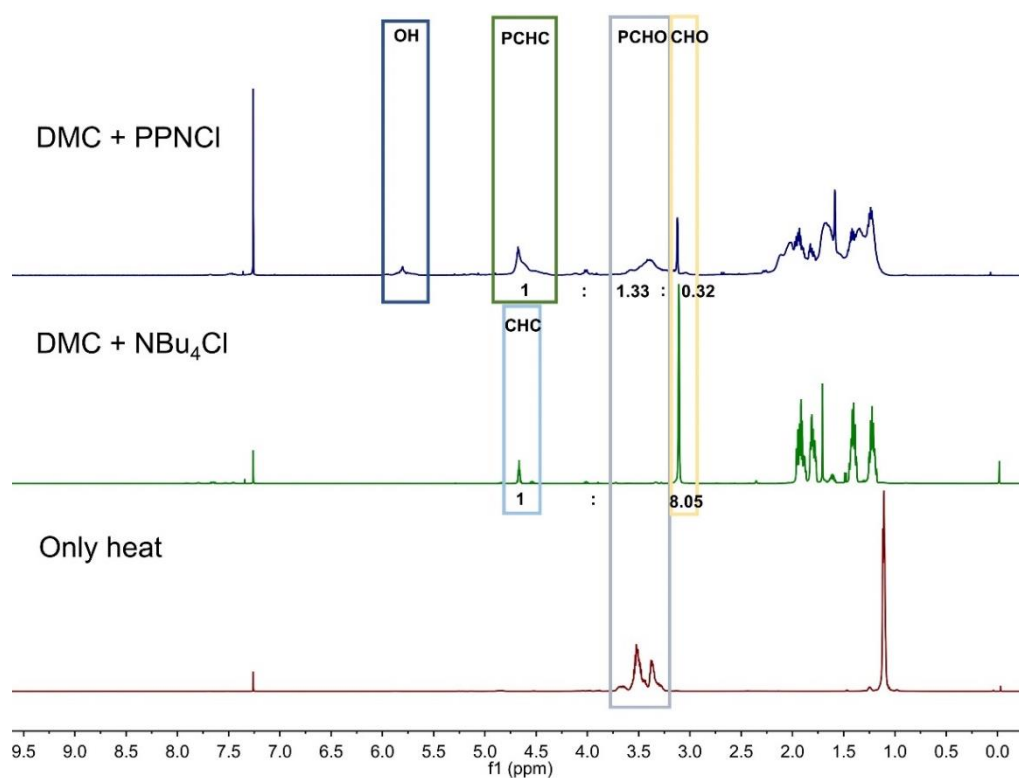

**Fig. S8** <sup>1</sup>H NMR spectra (CDCl<sub>3</sub>, 500M) of product at different conditions.

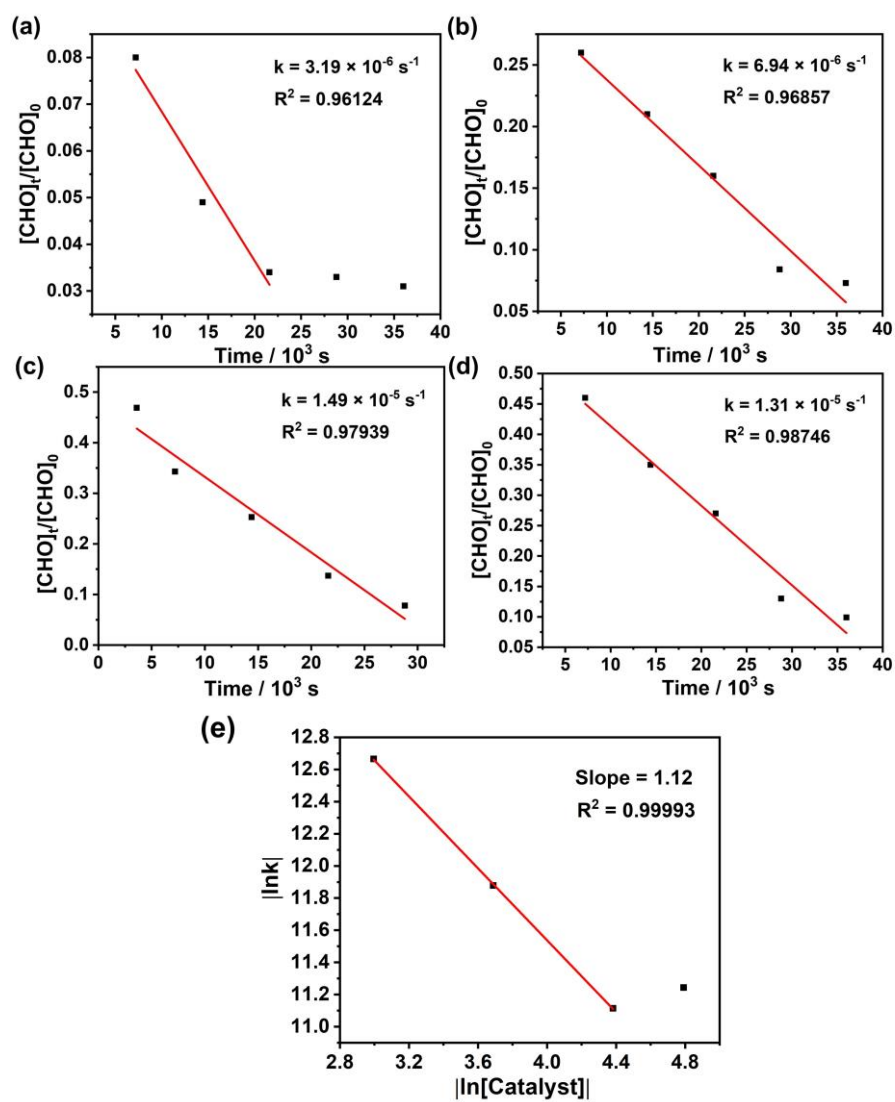

**Fig. S9** Kinetic data for plot of  $[\text{CHO}]_t/[\text{CHO}]_0$  versus time with catalyst 50 mM (a), 25 mM (b), 12.5 mM (c) and 8.3 mM (d). (e) Semilogarithmic plot of  $\ln[k]$  vs  $\ln[\text{catalyst}]$ .

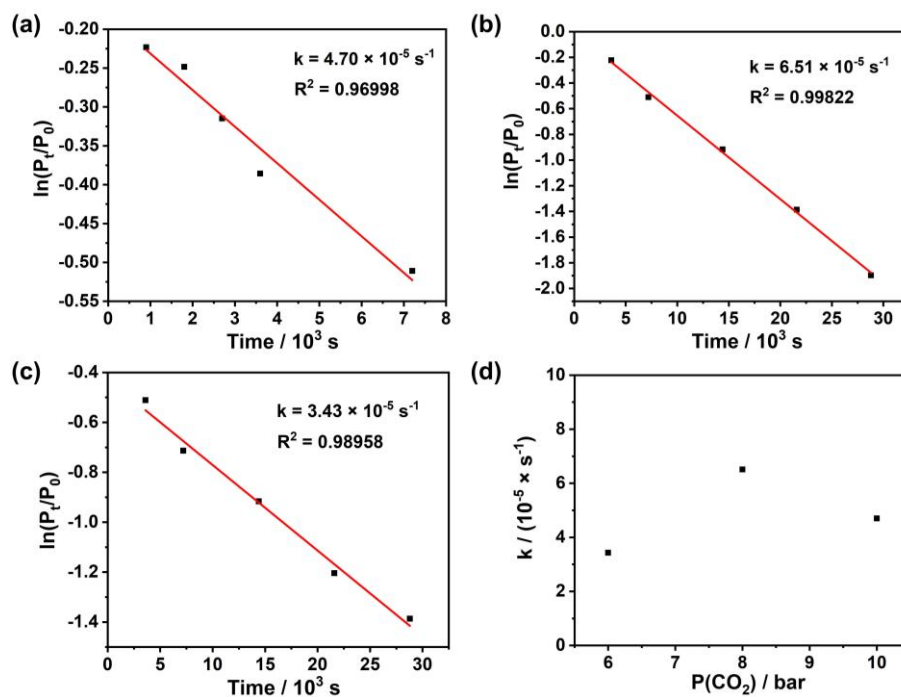

**Fig. S10** Kinetic data for semilogarithmic plot of  $\ln(P_t/P_0)$  versus time in  $\text{CO}_2$  pressure of 10 (a), 8 (b), 6 (c) bar. (d) Plot of  $k$  vs  $P(\text{CO}_2)$  from 6 to 10 bar.

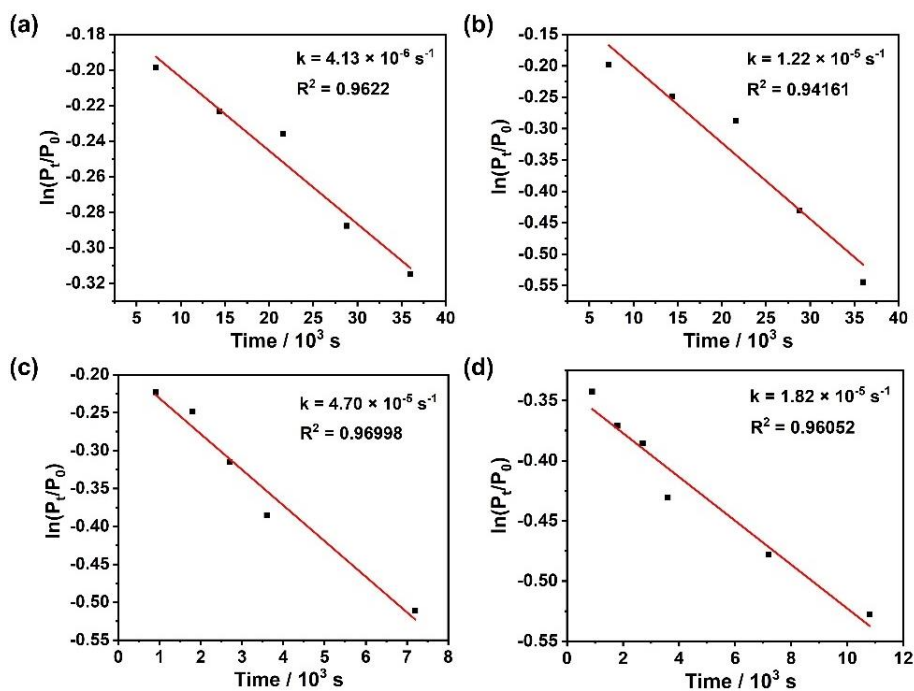

**Fig. S11** Kinetic data for semilogarithmic plot of  $\ln(P_t/P_0)$  versus time in 313 K (a), 333 K (b), 353 K (c) and 373 K (d).

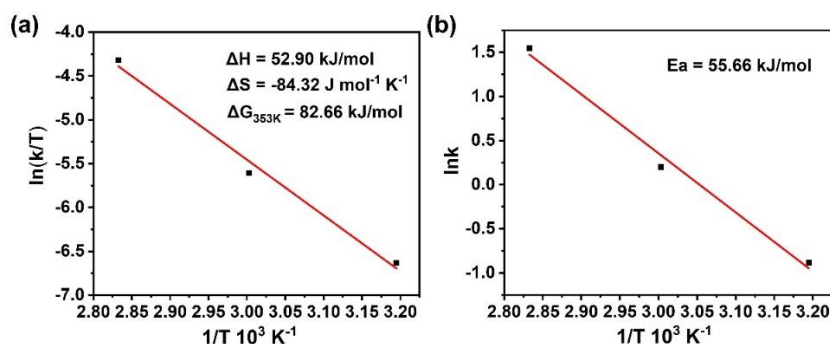

**Fig. S12** (a) Eyring plot,  $\ln(k/T)$  versus  $1/T$ , for CP 2 over the temperature range 313–353 K, 18.75 mM catalyst, neat CHO (0.5 mL), under 10 bar CO<sub>2</sub>. (b) Arrhenius analysis, plot of  $\ln k$  vs  $1/T$  for the CO<sub>2</sub>/CHO reaction using CP 2.

## References

- 1 SAINT, Program for Data Extraction and Reduction, Bruker AXS, Inc, Madison, WI, 2001.
- 2 G. M. Sheldrick, SADABS, Program for Empirical Adsorption Correction of Area Detector Data, University of Göttingen, Germany, 2003.
- 3 G. M. Sheldrick, SHELXT-2014, Program for the Crystal Structure Solution, University of Göttingen, Germany, 2014.
- 4 G. M. Sheldrick, SHELXL-2018, Program for the Crystal Structure Refinement, University of Göttingen, Germany, 2018.
- 5 D. S. P. Van and A. L. Spek, *Acta Cryst.* 1990, **46**, 194–201.
- 6 I. Kim, M. J. Yi, K. J. Lee, D. W. Park, B. U. Kim, C. S. Ha, *Catal. Today*, 2006, **111**, 292–296.
- 7 J. Lim, S. H. Yun, M. R. Kim, I. Kim, *J. Nanosci. Nanotechnol.*, 2017, **17**, 7507–7514.
- 8 Z. Shi, Q. Z. Jiang, Z. Z. Song, Z. H. Wang, G. L. Gao, *Polym. Chem.*, 2018, **9**, 4733–4743.
- 9 S. Chen, Z. B. Xiao, M. Y. Ma, *J. of Applied Polymer Sci.*, 2008, **107**, 3871–3877.
- 10 Q. Y. Meng, K. Pepper, R. H. Cheng, S. M. Howdle, B. P. Liu, *J. Polym. Sci. Pol. Chem.*, 2016, **54**, 2785–2793.
